# Supplementary material for: Multi-group analysis using generalized additive kernel canonical correlation analysis
Source: PubMed Central journal article supplement (PMC7387565; doi:10.1038/s41598-020-69575-x), 2020-07-28
Supplement: 41598_2020_69575_MOESM1_ESM.pdf [file 41598_2020_69575_MOESM1_ESM.pdf]

## Appendix A: Algorithm for GAKCCA

---

### Algorithm 1 Generalized Additive Kernel Canonical Correlation Analysis

---

Choose arbitrary vectors  $\tilde{\mathbf{a}}_{jl'}$  such that below condition holds :

$$\mathbf{a}_{jl'}^0 = \left[ (1 - \tau_j) \frac{1}{n} \sum_{l=1}^{p_j} \sum_{m=1}^{p_j} \tilde{\mathbf{a}}_{jl}^{0T} \widehat{\mathbf{K}}_{jl} \widehat{\mathbf{K}}_{jm} \tilde{\mathbf{a}}_{jm}^0 + \tau_j \sum_{l=1}^{p_j} \tilde{\mathbf{a}}_{jl}^{0T} \widehat{\mathbf{K}}_{jl} \tilde{\mathbf{a}}_{jl}^0 \right]^{(-1/2)} \tilde{\mathbf{a}}_{jl'}^0$$

**repeat**

**for**  $j \leftarrow 1$  to  $J$  **do**

**for**  $l' \leftarrow 1$  to  $p_j$  **do**

$$\begin{aligned} \mathbf{u}_j^{(s)} &= \sum_{l=1}^{l'-1} \widehat{\mathbf{K}}_{jl} \mathbf{a}_{jl}^{(s+1)} + \sum_{l=l'}^{p_j} \widehat{\mathbf{K}}_{jl} \mathbf{a}_{jl}^{(s)} \\ \mathbf{z}_j^{(s)} &= \sum_{k=1}^{j-1} c_{jk} w \left( \sum_{l=1}^{l'-1} \frac{1}{n} \mathbf{a}_{jl}^{T(s+1)} \widehat{\mathbf{K}}_{jl} \mathbf{u}_k^{(s+1)} + \sum_{l=l'}^{p_j} \frac{1}{n} \mathbf{a}_{jl}^{T(s)} \widehat{\mathbf{K}}_{jl} \mathbf{u}_k^{(s+1)} \right) \frac{1}{n} \mathbf{u}_k^{(s+1)} \\ &\quad + \sum_{k=j+1}^J c_{jk} w \left( \sum_{l=1}^{l'-1} \frac{1}{n} \mathbf{a}_{jl}^{T(s+1)} \widehat{\mathbf{K}}_{jl} \mathbf{u}_k^{(s)} + \sum_{l=l'}^{p_j} \frac{1}{n} \mathbf{a}_{jl}^{T(s)} \widehat{\mathbf{K}}_{jl} \mathbf{u}_k^{(s)} \right) \frac{1}{n} \mathbf{u}_k^{(s)} \\ r_j^{(s)} &= \sum_{l=1}^{l'-1} \mathbf{z}_j^{T(s+1)} \widehat{\mathbf{K}}_{jl} \mathbf{z}_j^{(s+1)} + \sum_{l=l'}^{p_j} \mathbf{z}_j^{T(s)} \widehat{\mathbf{K}}_{jl} \mathbf{z}_j^{(s)} \\ s_j^{(s)} &= \sum_{l=1}^{l'-1} \mathbf{u}_j^{T(s+1)} \widehat{\mathbf{K}}_{jl} \mathbf{z}_j^{(s+1)} + \sum_{l=l'}^{p_j} \mathbf{u}_j^{T(s)} \widehat{\mathbf{K}}_{jl} \mathbf{z}_j^{(s)} \\ \lambda_j &= - \left[ \frac{1 - \tau_j}{\tau_j} \frac{1}{n} s_j \right] \pm \sqrt{\left[ \frac{1 - \tau_j}{\tau_j} \frac{1}{n} s_j \right]^2 + 4 \frac{1}{\tau_j} r_j} \\ \mathbf{a}_{jl'}^{(s+1)} &= \frac{1}{\tau_j} \frac{1}{\lambda_j^{(s)}} \mathbf{z}_j^{(s)} - \frac{1}{n} \frac{1 - \tau_j}{\tau_j} \mathbf{u}_j^{(s)} \end{aligned}$$

**end for**

**end for**

**until** convergence of the criterion;

---

## Appendix B: List of variables in real data

**Table 6. Variables and Definitions**

| Groups                     | Variables                                                                                   | Definition                                                                                                                                                                                                                                                                                                               |
|----------------------------|---------------------------------------------------------------------------------------------|--------------------------------------------------------------------------------------------------------------------------------------------------------------------------------------------------------------------------------------------------------------------------------------------------------------------------|
| Psychosocial group         | KRQ:Emotion regulation                                                                      | Korean Resilience Quotient (3 categories. 9 subscales): Self-Regulation, Master, Positivity<br>- Self-Regulation = Emotion Regulation + Impulse Control + Causal Analysis<br>- Interpersonal Skills = Communication Skills + Empathy + Reaching Out<br>- Positivity = Realistic Optimism + Life-Satisfaction + Gratitude |
|                            | KRQ:Impulse control                                                                         |                                                                                                                                                                                                                                                                                                                          |
|                            | KRQ:Causal analysis                                                                         |                                                                                                                                                                                                                                                                                                                          |
|                            | KRQ:Communication                                                                           |                                                                                                                                                                                                                                                                                                                          |
|                            | KRQ:Empathy                                                                                 |                                                                                                                                                                                                                                                                                                                          |
|                            | KRQ:Self-expansion                                                                          |                                                                                                                                                                                                                                                                                                                          |
|                            | KRQ:Self-positivity                                                                         |                                                                                                                                                                                                                                                                                                                          |
|                            | KRQ:Life satisfaction                                                                       |                                                                                                                                                                                                                                                                                                                          |
|                            | KRQ:Appreciation                                                                            |                                                                                                                                                                                                                                                                                                                          |
|                            | MSSS:SES                                                                                    | MacArthur Scale of Subjective Social Status                                                                                                                                                                                                                                                                              |
|                            | MSSS:Community                                                                              |                                                                                                                                                                                                                                                                                                                          |
|                            | LES:Frequency of PE                                                                         |                                                                                                                                                                                                                                                                                                                          |
|                            | LES:Severity of PE                                                                          | Life Experiences Survey:<br>Frequency of Life Events, Severity of Life events, Intensity of Life Events                                                                                                                                                                                                                  |
|                            | LES:Frequency of NE                                                                         |                                                                                                                                                                                                                                                                                                                          |
|                            | LES:Severity of NE                                                                          |                                                                                                                                                                                                                                                                                                                          |
|                            | SSS:Emotional support                                                                       | Attributes of Social Support: :<br>Emotional, Instrumental, Informational, and Appraisal                                                                                                                                                                                                                                 |
|                            | SSS:Evaluative                                                                              |                                                                                                                                                                                                                                                                                                                          |
|                            | SSS:Information support                                                                     |                                                                                                                                                                                                                                                                                                                          |
| SSS:Material               |                                                                                             |                                                                                                                                                                                                                                                                                                                          |
| WHOQOL:Physical            | Physical Health, Psychological Health, Social Relationships and Environment                 |                                                                                                                                                                                                                                                                                                                          |
| WHOQOL:Social relationship |                                                                                             |                                                                                                                                                                                                                                                                                                                          |
| WHOQOL:Environment         |                                                                                             |                                                                                                                                                                                                                                                                                                                          |
| IRI:Perspective taking     | Perspective Taking (PT), Fantasy (FS),<br>Empathic Concern (EC), and Personal Distress (PD) |                                                                                                                                                                                                                                                                                                                          |
| IRI:Fantasy                |                                                                                             |                                                                                                                                                                                                                                                                                                                          |
| IRI:Empathic concern       |                                                                                             |                                                                                                                                                                                                                                                                                                                          |
| IRI:Personal distress      |                                                                                             |                                                                                                                                                                                                                                                                                                                          |
| ULS                        | Scale for Loneliness                                                                        |                                                                                                                                                                                                                                                                                                                          |
| Clinical group             | SCIDII:Avoidant                                                                             | Self-Questionnaire: Personality Disorders<br>- Cluster A (odd) -Paranoid, Schizoid, Schizotypal<br>- Cluster B (dramatic)- Antisocial, Borderline, Histrionic, Narcissistic<br>- Cluster C (anxious)- Avoidant, Dependent, Obsessive-compulsive                                                                          |
|                            | SCIDII:Dependent                                                                            |                                                                                                                                                                                                                                                                                                                          |
|                            | SCIDII:Obsessive-compulsive                                                                 |                                                                                                                                                                                                                                                                                                                          |
|                            | SCIDII:Passive-aggressive                                                                   |                                                                                                                                                                                                                                                                                                                          |
|                            | SCIDII:Depressive                                                                           |                                                                                                                                                                                                                                                                                                                          |
|                            | SCIDII:Paranoid                                                                             |                                                                                                                                                                                                                                                                                                                          |
|                            | SCIDII:Schizoid                                                                             |                                                                                                                                                                                                                                                                                                                          |
|                            | SCIDII:Histrionic                                                                           |                                                                                                                                                                                                                                                                                                                          |
|                            | SCIDII:Narcissistic                                                                         |                                                                                                                                                                                                                                                                                                                          |
|                            | SCIDII:Borderline                                                                           |                                                                                                                                                                                                                                                                                                                          |
|                            | SCIDII:Antisocial                                                                           |                                                                                                                                                                                                                                                                                                                          |
|                            | SSI-Beck                                                                                    | Scale for Suicide Ideation                                                                                                                                                                                                                                                                                               |
|                            | AUDIT-K                                                                                     | Scale for Alcohol Use Disorder                                                                                                                                                                                                                                                                                           |
| BAI                        | Scale for Anxiety                                                                           |                                                                                                                                                                                                                                                                                                                          |
| BDI-II                     | Scale for Depression                                                                        |                                                                                                                                                                                                                                                                                                                          |
| Structural MRI group       | T1 volume                                                                                   | T1 - T2 weighted images                                                                                                                                                                                                                                                                                                  |
|                            | T1/T2                                                                                       | T1 - T2 weighted images<br>(Indicator that indirectly shows the amount of myelin in the cortical grating meter.)                                                                                                                                                                                                         |
|                            | FA                                                                                          | DTI-Fractional Anisotropy                                                                                                                                                                                                                                                                                                |
|                            | MWF                                                                                         | Myelin Water Fraction, ViSTA                                                                                                                                                                                                                                                                                             |
| Neurodevelopmental group   | Age                                                                                         | Physical age                                                                                                                                                                                                                                                                                                             |
|                            | Years of Education                                                                          | Total training period in schools                                                                                                                                                                                                                                                                                         |
|                            | IQ                                                                                          | Estimated IQ                                                                                                                                                                                                                                                                                                             |
